# Supplementary material for: Certification and long-term stability monitoring of low-content folic acid and 5-methyltetrahydrofolate in human plasma certified reference material by isotope dilution ultra-high performance liquid chromatography/tandem mass spectrometry
Source: Royal Society of Chemistry journal article supplement (doi:10.1039/d4ay00997e), 2024-01-01
Supplement: d4ay00997e1.pdf [file d4ay00997e1.pdf]

### Supplementary Information

Certification and long-term stability monitoring of low-content folic acid and 5-methyltetrahydrofolate in human plasma certified reference material by isotope dilution ultra-high performance liquid chromatography/tandem mass spectrometry

Seok-Won Hyung\*, Joonhee Lee, Byungjoo Kim, Sunyoung Lee, Song-Yee Baek, JeeSoo Han

Division of Chemical and Material Metrology, Korea Research Institute of Standards and Science,  
Yuseong, Daejeon 34113, Republic of Korea

\*Corresponding Author. Tel.: +82 42 868 5490; Fax: +82 42 868 5801; E-mail address:

[swhyung@kriss.re.kr](mailto:swhyung@kriss.re.kr)

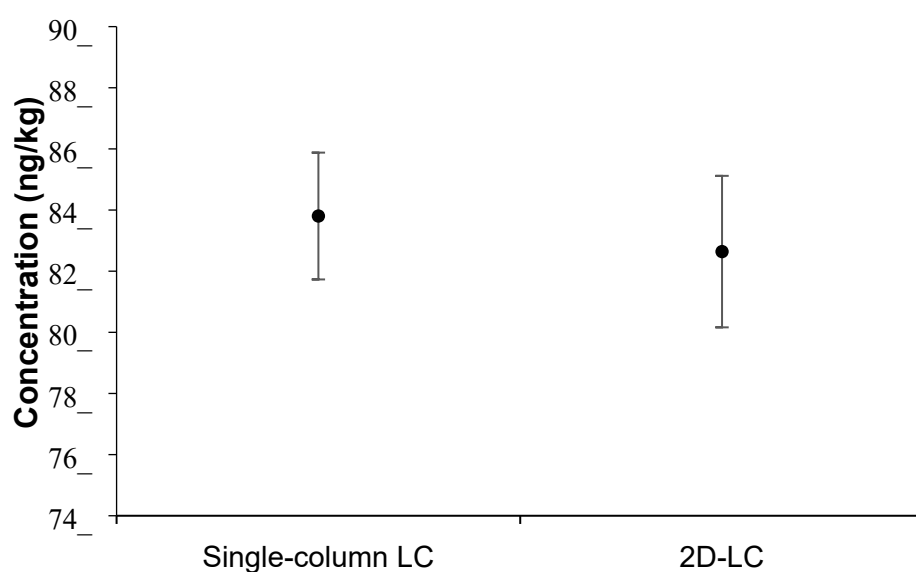

**Fig. S1.** Comparison of LC/MS measurement results for folic acid in the human plasma CRM using single-column LC with those obtained using 2D-LC. Three CRM sample units were used for the folic acid analysis. The error bar in the figure represents the combined standard uncertainty calculated using Equation 2 in the main manuscript.

**Table S1** Standard error of the isotope ratio of folic acid and  $^{13}\text{C}_5$ -folic acid in the units of selected human plasma CRM obtained by multiple measurements using LC-MS/MS

| Number of CRM units <sup>a</sup> | Run 1 | Run 2 | Run 3 | Run 4 | Run 5          | Average | Standard error (%) |
|----------------------------------|-------|-------|-------|-------|----------------|---------|--------------------|
| 1                                | 0.919 | 0.914 | 0.910 | 0.905 | - <sup>a</sup> | 0.912   | 0.32               |
| 181                              | 1.08  | 1.07  | 1.03  | 1.07  | 0.942          | 1.04    | 2.48               |
| 437                              | 1.14  | 1.08  | 1.13  | 1.09  | 1.11           | 1.11    | 0.93               |
| 500                              | 0.967 | 0.874 | 0.927 | 0.918 | 0.844          | 0.906   | 2.37               |
| 662                              | 1.16  | 1.22  | 1.13  | 1.20  | 1.12           | 1.17    | 1.67               |
| 855                              | 1.09  | 1.18  | 1.16  | 1.09  | 1.04           | 1.11    | 2.24               |
| 1045                             | 1.12  | 1.11  | 1.10  | 1.07  | 1.03           | 1.09    | 1.52               |
| 1377                             | 1.16  | 1.20  | 1.16  | 1.18  | 1.10           | 1.16    | 1.49               |
| 1539                             | 1.12  | 1.22  | 1.23  | 1.21  | 1.15           | 1.18    | 1.78               |
| 1942                             | 1.13  | 1.17  | 1.15  | 1.14  | 1.17           | 1.15    | 0.69               |

<sup>a</sup> Data was not acquired.

**Table S2** Results of stability assessments of FA and 5-Me-THF in the human plasma CRM

|                       | Conditions        | Values (ng/kg)           |                        |                                  |
|-----------------------|-------------------|--------------------------|------------------------|----------------------------------|
|                       |                   | Average $\pm U_{exp.}^c$ | $ x_{CRM} - x_{meas} $ | $k\sqrt{u_{CRM}^2 + u_{meas}^2}$ |
| FA <sup>a</sup>       | Certification     | 84.6 $\pm$ 4.26          | -                      | -                                |
|                       | -20 °C, 2 months  | 76.7 $\pm$ 9.01          | 7.9                    | 9.5                              |
|                       | -70 °C, 6 months  | 82.9 $\pm$ 10.2          | 1.7                    | 11                               |
|                       | -70 °C, 12 months | 76.1 $\pm$ 15.0          | 8.6                    | 22                               |
|                       | -70 °C, 29 months | 83.9 $\pm$ 8.94          | 0.76                   | 8.0                              |
|                       | -70 °C, 58 months | 78.3 $\pm$ 9.57          | 1.6                    | 12                               |
|                       | Conditions        | Values ( $\mu$ g/kg)     |                        |                                  |
|                       |                   | Average $\pm U_{exp.}^c$ | $ x_{CRM} - x_{meas} $ | $k\sqrt{u_{CRM}^2 + u_{meas}^2}$ |
| 5-Me-THF <sup>b</sup> | Certification     | 5.80 $\pm$ 0.47          | -                      | -                                |
|                       | -20 °C, 2 months  | 5.73 $\pm$ 0.13          | 0.073                  | 0.47                             |
|                       | -70 °C, 5 months  | 5.76 $\pm$ 0.15          | 0.037                  | 0.47                             |
|                       | -70 °C, 12 months | 5.97 $\pm$ 0.15          | 0.16                   | 0.48                             |
|                       | -70 °C, 24 months | 5.86 $\pm$ 0.15          | 0.059                  | 0.47                             |
|                       | -70 °C, 48 months | 5.82 $\pm$ 0.23          | 0.088                  | 0.24                             |

<sup>a</sup> Folic acid<sup>b</sup> 5-Methyltetrahydrofolate<sup>c</sup> Expanded uncertainty at 95% of confidence level
